# Supplementary material
Source: publisher figshare collection journal article supplement (https://gsajournals.figshare.com/ndownloader/files/14331782)
Supplement: Supplementary file 1 [file 14331782]

## Sheet: Purple Module
Supplementary file S7. List of GO terms and KEGG pathways for different modules in integrated network.
GO Terms	Overlap	P-value	Adjusted P-value	Old P-value	Old Adjusted P-value	Z-score	Combined Score	Genes			KEGG pathway	Overlap	P-value	Adjusted P-value	Old P-value	Old Adjusted P-value	Z-score	Combined Score	Genes
adenylate cyclase-inhibiting G-protein coupled receptor signaling pathway (GO:0007193)	5/64	7.12058e-11	6.47973e-09	5.31213e-10	4.83404e-08	-1.514	35.3753	CHRM2;GRM7;HTR1E;GRM6;ADCY1			Neuroactive ligand-receptor interaction_Homo sapiens_hsa04080	7/277	1.04982e-11	5.45907e-10	1.78313e-08	9.27229e-07	-1.89338	47.8644	CHRM2;HTR1E;GRM7;GRM6;CNR1;SSTR1;RXFP3
G-protein coupled receptor signaling pathway, coupled to cyclic nucleotide second messenger (GO:0007187)	5/126	2.25143e-09	9.67674e-08	1.38162e-08	5.85646e-07	-1.72702	34.3879	CHRM2;HTR1E;CNR1;SSTR1;RXFP3			cAMP signaling pathway_Homo sapiens_hsa04024	4/199	1.90579e-06	4.95507e-05	0.000124347	0.00323303	-1.91871	25.2706	CHRM2;HTR1E;ADCY1;SSTR1
adenylate cyclase-modulating G-protein coupled receptor signaling pathway (GO:0007188)	5/135	3.19013e-09	9.67674e-08	1.9307e-08	5.85646e-07	-1.30922	25.6125	CHRM2;HTR1E;CNR1;ADCY1;RXFP3			Glutamatergic synapse_Homo sapiens_hsa04724	3/114	2.10225e-05	0.00036439	0.000497173	0.00861767	-1.88428	20.2935	GRM7;GRM6;ADCY1
adenylate cyclase-inhibiting G-protein coupled glutamate receptor signaling pathway (GO:0007196)	2/7	4.71894e-06	0.000107356	1.54931e-05	0.000352467	-3.59143	44.045	GRM7;GRM6			Phospholipase D signaling pathway_Homo sapiens_hsa04072	3/144	4.22707e-05	0.000549519	0.00096911	0.0125984	-1.82026	18.3326	GRM7;GRM6;ADCY1
G-protein coupled glutamate receptor signaling pathway (GO:0007216)	2/16	2.69007e-05	0.000489593	6.5627e-05	0.00119441	-2.24294	23.6033	GRM7;GRM6			Taste transduction_Homo sapiens_hsa04742	2/83	0.000749345	0.00779319	0.00612185	0.0636672	-1.79805	12.9393	TAS2R40;HTR1E
glutamate receptor signaling pathway (GO:0007215)	2/37	0.000148465	0.00225172	0.000315384	0.00478332	-2.03237	17.9157	GRM7;GRM6			Retrograde endocannabinoid signaling_Homo sapiens_hsa04723	2/101	0.00110669	0.0095913	0.00888532	0.0770061	-1.79744	12.2341	CNR1;ADCY1
regulation of synaptic transmission, glutamatergic (GO:0051966)	2/46	0.000230169	0.0029922	0.000478505	0.00622056	-1.41203	11.8281	GRM7;GRM6			Cholinergic synapse_Homo sapiens_hsa04725	2/111	0.00133432	0.00991211	0.0106225	0.0789101	-1.88975	12.5089	CHRM2;ADCY1
chemical synaptic transmission (GO:0007268)	3/290	0.000335747	0.00381912	0.000892153	0.0101482	-1.34576	10.7649	CHRM2;GRM7;HTR1E			Calcium signaling pathway_Homo sapiens_hsa04020	2/180	0.00345679	0.0224692	0.0262343	0.170523	-1.78141	10.096	CHRM2;ADCY1
neuropeptide signaling pathway (GO:0007218)	2/71	0.000548955	0.00555054	0.00110456	0.0111684	-1.2868	9.66062	SSTR1;RXFP3			Rap1 signaling pathway_Homo sapiens_hsa04015	2/211	0.00471472	0.0272406	0.0351224	0.194984	-1.76034	9.43027	CNR1;ADCY1
modulation of chemical synaptic transmission (GO:0050804)	2/83	0.000749345	0.00681904	0.00149385	0.0135941	-1.40606	10.1185	GRM7;GRM6			Ovarian steroidogenesis_Homo sapiens_hsa04913	1/50	0.0247261	0.0706342	0.0703636	0.194984	-1.56391	5.78631	ADCY1
phospholipase C-activating G-protein coupled receptor signaling pathway (GO:0007200)	2/92	0.000919552	0.0076072	0.00182296	0.0150808	-1.20097	8.39674	CHRM2;RXFP3			Regulation of lipolysis in adipocytes_Homo sapiens_hsa04923	1/56	0.027656	0.0706342	0.0783415	0.194984	-1.51742	5.44437	ADCY1
cellular response to organic cyclic compound (GO:0071407)	2/136	0.00199306	0.015114	0.00387884	0.0294146	-1.29552	8.05564	ADCY1;SSTR1			Prion diseases_Homo sapiens_hsa05020	1/35	0.0173667	0.0706342	0.0501461	0.194984	-1.3325	5.40091	C5
adenylate cyclase-inhibiting G-protein coupled acetylcholine receptor signaling pathway (GO:0007197)	1/7	0.00349528	0.0198794	0.00552695	0.0313954	-3.23968	18.3248	CHRM2			Longevity regulating pathway - multiple species_Homo sapiens_hsa04213	1/64	0.0315501	0.0706342	0.0888829	0.194984	-1.52466	5.26951	ADCY1
phospholipase C-activating G-protein coupled acetylcholine receptor signaling pathway (GO:0007207)	1/7	0.00349528	0.0198794	0.00552695	0.0313954	-3.19158	18.0527	CHRM2			Staphylococcus aureus infection_Homo sapiens_hsa05150	1/56	0.027656	0.0706342	0.0783415	0.194984	-1.34427	4.82312	C5
negative regulation of amino acid transport (GO:0051956)	1/7	0.00349528	0.0198794	0.00552695	0.0313954	-3.13051	17.7072	GRM7			Long-term potentiation_Homo sapiens_hsa04720	1/66	0.0325214	0.0706342	0.0915013	0.194984	-1.39703	4.78603	ADCY1
cellular response to lipid (GO:0071396)	2/179	0.0034193	0.0198794	0.00657885	0.0313954	-1.17132	6.65112	ADCY1;SSTR1			Gastric acid secretion_Homo sapiens_hsa04971	1/74	0.036398	0.0706342	0.101907	0.194984	-1.43766	4.7633	ADCY1
response to forskolin (GO:1904321)	1/9	0.00449191	0.0204382	0.00690438	0.0313954	-2.54888	13.7779	ADCY1			Thyroid hormone synthesis_Homo sapiens_hsa04918	1/71	0.034946	0.0706342	0.0980175	0.194984	-1.32513	4.44443	ADCY1
regulation of chemokine secretion (GO:0090196)	1/9	0.00449191	0.0204382	0.00690438	0.0313954	-2.51682	13.6046	C5			Aldosterone synthesis and secretion_Homo sapiens_hsa04925	1/81	0.0397786	0.0706342	0.110924	0.194984	-1.37623	4.43756	ADCY1
cellular response to forskolin (GO:1904322)	1/9	0.00449191	0.0204382	0.00690438	0.0313954	-2.29748	12.419	ADCY1			Bile secretion_Homo sapiens_hsa04976	1/71	0.034946	0.0706342	0.0980175	0.194984	-1.26161	4.23137	ADCY1
positive regulation of chemokine secretion (GO:0090197)	1/9	0.00449191	0.0204382	0.00690438	0.0313954	-1.6091	8.69795	C5			Insulin secretion_Homo sapiens_hsa04911	1/85	0.0417055	0.0706342	0.11604	0.194984	-1.25287	3.98053	ADCY1
negative regulation of leukocyte chemotaxis (GO:0002689)	1/10	0.00498989	0.0208073	0.00759245	0.0313954	-3.08046	16.3275	C5			Complement and coagulation cascades_Homo sapiens_hsa04610	1/79	0.0388138	0.0706342	0.108356	0.194984	-1.20457	3.91364	C5
positive regulation of calcium ion import (GO:0090280)	1/11	0.00548764	0.0208073	0.0082801	0.0313954	-2.81417	14.6485	GRM6			Pertussis_Homo sapiens_hsa05133	1/75	0.0368816	0.0706342	0.1032	0.194984	-1.1578	3.8208	C5
detection of light stimulus involved in visual perception (GO:0050908)	1/11	0.00548764	0.0208073	0.0082801	0.0313954	-2.55558	13.3025	GRM6			GABAergic synapse_Homo sapiens_hsa04727	1/88	0.0431485	0.0706342	0.119859	0.194984	-1.19188	3.74619	ADCY1
detection of light stimulus involved in sensory perception (GO:0050962)	1/11	0.00548764	0.0208073	0.0082801	0.0313954	-2.38194	12.3986	GRM6			GnRH signaling pathway_Homo sapiens_hsa04912	1/91	0.0445894	0.0706342	0.123664	0.194984	-1.18721	3.69254	ADCY1
activation of protein kinase activity (GO:0032147)	2/234	0.0057658	0.0209875	0.0109735	0.0363911	-1.24503	6.41913	C5;ADCY1			Salivary secretion_Homo sapiens_hsa04970	1/89	0.043629	0.0706342	0.121129	0.194984	-1.13986	3.57007	ADCY1
anterograde trans-synaptic signaling (GO:0098916)	2/241	0.00610527	0.0213684	0.0116055	0.0363911	-1.18987	6.06667	GRM7;HTR1E			Dilated cardiomyopathy_Homo sapiens_hsa05414	1/90	0.0441093	0.0706342	0.122397	0.194984	-1.14024	3.55878	ADCY1
detection of visible light (GO:0009584)	1/17	0.00846946	0.024862	0.012397	0.0363911	-2.56899	12.2574	GRM6			Gap junction_Homo sapiens_hsa04540	1/88	0.0431485	0.0706342	0.119859	0.194984	-1.11858	3.51582	ADCY1
regulation of macrophage chemotaxis (GO:0010758)	1/16	0.00797305	0.024862	0.0117119	0.0363911	-2.52144	12.1828	C5			Longevity regulating pathway - mammal_Homo sapiens_hsa04211	1/94	0.0460284	0.0706342	0.127454	0.194984	-1.10901	3.41409	ADCY1
G-protein coupled acetylcholine receptor signaling pathway (GO:0007213)	1/17	0.00846946	0.024862	0.012397	0.0363911	-2.34018	11.1657	CHRM2			Inflammatory mediator regulation of TRP channels_Homo sapiens_hsa04750	1/98	0.0479441	0.0706342	0.132484	0.194984	-1.10759	3.36456	ADCY1
cAMP biosynthetic process (GO:0006171)	1/15	0.00747641	0.024862	0.0110264	0.0363911	-2.22346	10.8861	ADCY1			Circadian entrainment_Homo sapiens_hsa04713	1/95	0.0465077	0.0706342	0.128714	0.194984	-1.09537	3.36075	ADCY1
activation of protein kinase A activity (GO:0034199)	1/17	0.00846946	0.024862	0.012397	0.0363911	-1.61139	7.6884	ADCY1			Morphine addiction_Homo sapiens_hsa05032	1/91	0.0445894	0.0706342	0.123664	0.194984	-1.07847	3.35432	ADCY1
acetylcholine receptor signaling pathway (GO:0095500)	1/20	0.00995735	0.0272478	0.0144496	0.0386835	-2.21376	10.2042	CHRM2			Progesterone-mediated oocyte maturation_Homo sapiens_hsa04914	1/98	0.0479441	0.0706342	0.132484	0.194984	-1.04499	3.17439	ADCY1
regulation of calcium ion import (GO:0090279)	1/23	0.0114432	0.0272478	0.0164984	0.0386835	-2.26048	10.1052	GRM6			Estrogen signaling pathway_Homo sapiens_hsa04915	1/99	0.0484225	0.0706342	0.133737	0.194984	-0.994491	3.01111	ADCY1
cyclic nucleotide metabolic process (GO:0009187)	1/26	0.0129271	0.0272478	0.0185434	0.0386835	-2.29799	9.99266	ADCY1			Melanogenesis_Homo sapiens_hsa04916	1/100	0.0489006	0.0706342	0.134989	0.194984	-0.949252	2.86481	ADCY1
regulation of smooth muscle contraction (GO:0006940)	1/24	0.0119381	0.0272478	0.0171805	0.0386835	-2.25138	9.96916	CHRM2			Amoebiasis_Homo sapiens_hsa05146	1/100	0.0489006	0.0706342	0.134989	0.194984	-0.91807	2.7707	ADCY1
cyclic nucleotide biosynthetic process (GO:0009190)	1/20	0.00995735	0.0272478	0.0144496	0.0386835	-2.13796	9.85482	ADCY1			Pancreatic secretion_Homo sapiens_hsa04972	1/96	0.0469867	0.0706342	0.129972	0.194984	-0.900897	2.75485	ADCY1
cGMP biosynthetic process (GO:0006182)	1/25	0.0124327	0.0272478	0.0178622	0.0386835	-2.1394	9.38648	ADCY1			Chagas disease (American trypanosomiasis)_Homo sapiens_hsa05142	1/104	0.0508111	0.0714102	0.13998	0.196729	-0.85424	2.54533	ADCY1
response to glucagon (GO:0033762)	1/35	0.0173667	0.0272478	0.0246554	0.0386835	-2.29561	9.30455	ADCY1			Serotonergic synapse_Homo sapiens_hsa04726	1/112	0.0546217	0.0747454	0.149885	0.205105	-0.86422	2.51257	HTR1E
cAMP metabolic process (GO:0046058)	1/25	0.0124327	0.0272478	0.0178622	0.0386835	-2.07739	9.11439	ADCY1			Platelet activation_Homo sapiens_hsa04611	1/122	0.0593655	0.075893	0.162121	0.207157	-0.887108	2.50523	ADCY1
regulation of vascular endothelial growth factor production (GO:0010574)	1/28	0.0139152	0.0272478	0.0199046	0.0386835	-2.07923	8.88824	C5			Vascular smooth muscle contraction_Homo sapiens_hsa04270	1/120	0.0584184	0.075893	0.159686	0.207157	-0.839647	2.3847	ADCY1
synaptic transmission, cholinergic (GO:0007271)	1/29	0.014409	0.0272478	0.0205846	0.0386835	-1.96741	8.34163	CHRM2			Oocyte meiosis_Homo sapiens_hsa04114	1/123	0.0598387	0.075893	0.163336	0.207157	-0.824006	2.32048	ADCY1
positive regulation of adenylate cyclase activity (GO:0045762)	1/34	0.0168743	0.0272478	0.023978	0.0386835	-2.01585	8.22861	ADCY1			Systemic lupus erythematosus_Homo sapiens_hsa05322	1/135	0.0655005	0.0810958	0.177791	0.220122	-0.723006	1.9707	C5
cyclic purine nucleotide metabolic process (GO:0052652)	1/31	0.0153958	0.0272478	0.0219432	0.0386835	-1.95349	8.15322	ADCY1			Adrenergic signaling in cardiomyocytes_Homo sapiens_hsa04261	1/148	0.0715994	0.0865853	0.193196	0.233633	-0.809974	2.13563	ADCY1
cGMP metabolic process (GO:0046068)	1/29	0.014409	0.0272478	0.0205846	0.0386835	-1.89575	8.03781	ADCY1			Oxytocin signaling pathway_Homo sapiens_hsa04921	1/158	0.0762665	0.0901331	0.204869	0.242118	-0.847169	2.18021	ADCY1
positive regulation of calcium ion transport (GO:0051928)	1/34	0.0168743	0.0272478	0.023978	0.0386835	-1.96578	8.02425	GRM6			cGMP-PKG signaling pathway_Homo sapiens_hsa04022	1/167	0.0804488	0.092963	0.215245	0.248728	-0.798665	2.01274	ADCY1
positive regulation of vascular endothelial growth factor production (GO:0010575)	1/25	0.0124327	0.0272478	0.0178622	0.0386835	-1.82542	8.00888	C5			Purine metabolism_Homo sapiens_hsa00230	1/176	0.084614	0.0956506	0.225499	0.254911	-0.710175	1.75389	ADCY1
nucleotide biosynthetic process (GO:0009165)	1/27	0.0134213	0.0272478	0.0192242	0.0386835	-1.82279	7.85787	ADCY1			Chemokine signaling pathway_Homo sapiens_hsa04062	1/187	0.0896818	0.0971553	0.237867	0.257689	-0.709064	1.7099	ADCY1
cellular response to ketone (GO:1901655)	1/29	0.014409	0.0272478	0.0205846	0.0386835	-1.83248	7.76952	ADCY1			Herpes simplex infection_Homo sapiens_hsa05168	1/185	0.0887623	0.0971553	0.235631	0.257689	-0.680789	1.64873	C5
negative regulation of secretion by cell (GO:1903531)	1/31	0.0153958	0.0272478	0.0219432	0.0386835	-1.85673	7.74935	GRM7			Regulation of actin cytoskeleton_Homo sapiens_hsa04810	1/214	0.102014	0.10826	0.267476	0.283852	-0.733759	1.67491	CHRM2
regulation of muscle contraction (GO:0006937)	1/27	0.0134213	0.0272478	0.0192242	0.0386835	-1.79539	7.73977	CHRM2			HTLV-I infection_Homo sapiens_hsa05166	1/258	0.121789	0.126661	0.313514	0.326055	-0.718981	1.51379	ADCY1
cyclic-nucleotide-mediated signaling (GO:0019935)	1/33	0.0163817	0.0272478	0.0233002	0.0386835	-1.83255	7.53468	ADCY1			PI3K-Akt signaling pathway_Homo sapiens_hsa04151	1/341	0.158029	0.161127	0.393333	0.401045	-0.770704	1.42193	CHRM2
renal water homeostasis (GO:0003091)	1/32	0.0158888	0.0272478	0.0226219	0.0386835	-1.8115	7.50348	ADCY1			Pathways in cancer_Homo sapiens_hsa05200	1/397	0.181713	0.181713	0.442361	0.442361	-0.748416	1.27629	ADCY1
activation of adenylate cyclase activity (GO:0007190)	1/33	0.0163817	0.0272478	0.0233002	0.0386835	-1.65903	6.82123	ADCY1
response to estradiol (GO:0032355)	1/31	0.0153958	0.0272478	0.0219432	0.0386835	-1.63199	6.81137	SSTR1
cellular response to glucagon stimulus (GO:0071377)	1/33	0.0163817	0.0272478	0.0233002	0.0386835	-1.63825	6.73581	ADCY1
cellular response to estradiol stimulus (GO:0071392)	1/21	0.0104529	0.0272478	0.015133	0.0386835	-1.45933	6.65582	SSTR1
positive regulation of cytokinesis (GO:0032467)	1/35	0.0173667	0.0272478	0.0246554	0.0386835	-1.58025	6.40509	RXFP3
positive regulation of chemokine production (GO:0032722)	1/35	0.0173667	0.0272478	0.0246554	0.0386835	-1.3419	5.43899	C5
regulation of blood circulation (GO:1903522)	1/37	0.0183508	0.0283038	0.026009	0.0401156	-1.60202	6.40501	CHRM2
positive regulation of cell division (GO:0051781)	1/42	0.0208073	0.0305397	0.0293855	0.0431304	-2.01278	7.79441	RXFP3
detection of chemical stimulus involved in sensory perception of bitter taste (GO:0001580)	1/41	0.0203164	0.0305397	0.0287111	0.0431304	-1.48966	5.80421	TAS2R40
sensory perception of bitter taste (GO:0050913)	1/42	0.0208073	0.0305397	0.0293855	0.0431304	-1.36364	5.28063	TAS2R40
cellular response to calcium ion (GO:0071277)	1/43	0.0212979	0.0307637	0.0300596	0.0434194	-2.16042	8.31576	ADCY1
detection of chemical stimulus involved in sensory perception of taste (GO:0050912)	1/45	0.0222785	0.0316773	0.0314064	0.0446559	-1.45444	5.53287	TAS2R40
regulation of cytokinesis (GO:0032465)	1/78	0.0383311	0.0496662	0.0533871	0.0691407	-2.12773	6.93956	RXFP3
sensory perception of mechanical stimulus (GO:0050954)	1/79	0.0388138	0.0496662	0.0540461	0.0691407	-1.65859	5.38871	GRM7
adenylate cyclase-activating G-protein coupled receptor signaling pathway (GO:0007189)	1/79	0.0388138	0.0496662	0.0540461	0.0691407	-1.61502	5.24717	ADCY1
cAMP-mediated signaling (GO:0019933)	1/76	0.037365	0.0496662	0.0520679	0.0691407	-1.49492	4.91385	ADCY1
purine ribonucleotide biosynthetic process (GO:0009152)	1/76	0.037365	0.0496662	0.0520679	0.0691407	-1.48124	4.86885	ADCY1
visual perception (GO:0007601)	1/79	0.0388138	0.0496662	0.0540461	0.0691407	-1.23793	4.02201	GRM6
response to calcium ion (GO:0051592)	1/80	0.0392963	0.0496662	0.0547047	0.0691407	-1.23685	4.00323	ADCY1
positive regulation of cytokine secretion (GO:0050715)	1/74	0.036398	0.0496662	0.0507469	0.0691407	-1.18847	3.93767	C5
sensory perception of sound (GO:0007605)	1/82	0.0402607	0.0501879	0.0560207	0.069834	-1.28713	4.13475	GRM7
regulation of heart contraction (GO:0008016)	1/96	0.0469867	0.0577809	0.0651864	0.0801617	-1.61989	4.95343	CHRM2
cellular response to metal ion (GO:0071248)	1/101	0.0493786	0.0599127	0.0684405	0.0830411	-1.24754	3.7529	ADCY1
regulation of protein activation cascade (GO:2000257)	1/109	0.0531943	0.0623708	0.0736257	0.0862979	-1.94756	5.71376	C5
cellular response to peptide hormone stimulus (GO:0071375)	1/111	0.0541461	0.0623708	0.0749179	0.0862979	-1.74973	5.10235	ADCY1
regulation of complement activation (GO:0030449)	1/110	0.0536703	0.0623708	0.074272	0.0862979	-1.30131	3.80619	C5
positive regulation of cell cycle process (GO:0090068)	1/108	0.0527181	0.0623708	0.072979	0.0862979	-1.20854	3.55648	RXFP3
regulation of immune effector process (GO:0002697)	1/115	0.0560471	0.0629664	0.0774975	0.0870651	-2.7246	7.8511	C5
regulation of humoral immune response (GO:0002920)	1/114	0.0555721	0.0629664	0.0768532	0.0870651	-2.14733	6.20595	C5
activation of MAPK activity (GO:0000187)	1/118	0.0574705	0.0637783	0.079428	0.0881457	-1.05149	3.00358	C5
regulation of acute inflammatory response (GO:0002673)	1/122	0.0593655	0.0650875	0.0819963	0.0898995	-1.49915	4.23365	C5
regulation of protein processing (GO:0070613)	1/129	0.0626734	0.0678962	0.0864753	0.0936816	-1.72745	4.78473	C5
positive regulation of MAP kinase activity (GO:0043406)	1/178	0.0855373	0.0915753	0.117282	0.12556	-1.41238	3.47278	C5
positive regulation of cytokine production (GO:0001819)	1/221	0.105187	0.111302	0.143542	0.151887	-1.83508	4.13264	C5
cellular response to oxygen-containing compound (GO:1901701)	1/275	0.129324	0.13527	0.175523	0.183593	-1.10405	2.25827	SSTR1
negative regulation of cell proliferation (GO:0008285)	1/364	0.16783	0.173551	0.225894	0.233595	-1.73113	3.08973	SSTR1
nervous system development (GO:0007399)	1/456	0.206016	0.210646	0.275035	0.281216	-1.24118	1.96082	CHRM2
negative regulation of cellular process (GO:0048523)	1/535	0.23754	0.240179	0.314972	0.318472	-1.29828	1.86617	SSTR1
regulation of cell proliferation (GO:0042127)	1/741	0.314512	0.314512	0.409968	0.409968	-1.05897	1.22495	SSTR1

## Sheet: Orange Module
Supplementary file S7. List of GO terms and KEGG pathways for different moduls in intergrated network.
GO Terms	Overlap	P-value	Adjusted P-value	Old P-value	Old Adjusted P-value	Z-score	Combined Score	Genes			KEGG pathway	Overlap	P-value	Adjusted P-value	Old P-value	Old Adjusted P-value	Z-score	Combined Score	Genes
positive regulation of developmental process (GO:0051094)	4/114	4.78436e-07	9.3295e-05	1.33635e-06	0.000260587	-1.41576	20.6031	DLX1;FGF8;ISL1;FOXA2			Maturity onset diabetes of the young_Homo sapiens_hsa04950	2/26	0.000106401	0.00138321	0.000318515	0.0041407	-1.84021	16.8348	FOXA2;NKX2-2
pituitary gland development (GO:0021983)	2/8	9.22199e-06	0.000444443	2.36492e-05	0.0013321	-2.48695	28.8335	SOX2;SIX3			Signaling pathways regulating pluripotency of stem cells_Homo sapiens_hsa04550	2/142	0.00315317	0.0204956	0.0082086	0.0533559	-1.80386	10.389	SOX2;ISL1
negative regulation of neuron differentiation (GO:0045665)	3/65	7.05889e-06	0.000444443	1.60287e-05	0.0013321	-2.13293	25.2992	SOX2;DLX1;SIX3			Longevity regulating pathway - multiple species_Homo sapiens_hsa04213	1/64	0.0377415	0.135815	0.0630944	0.226463	-1.94207	6.36415	FOXA2
regulation of transcription, DNA-templated (GO:0006355)	7/1599	1.1396e-05	0.000444443	4.56299e-05	0.00177957	-1.83185	20.8506	SOX2;LHX3;LHX2;FEV;FOXG1;SIX3;FOXA2			Melanoma_Homo sapiens_hsa05218	1/71	0.0417893	0.135815	0.0696809	0.226463	-1.85564	5.89188	FGF8
regulation of transcription from RNA polymerase II promoter (GO:0006357)	7/1479	6.78093e-06	0.000444443	2.73251e-05	0.0013321	-1.37684	16.3863	SOX2;DLX1;LHX3;FEV;FOXG1;ISL1;FOXA2			FoxO signaling pathway_Homo sapiens_hsa04068	1/133	0.0769655	0.166458	0.126307	0.268474	-1.7246	4.42256	FOXG1
positive regulation of transcription, DNA-templated (GO:0045893)	6/1121	2.11024e-05	0.000685828	7.30505e-05	0.00237414	-1.70794	18.3879	SOX2;DLX1;LHX3;LHX2;ISL1;FOXA2			Hippo signaling pathway_Homo sapiens_hsa04390	1/153	0.0880575	0.166458	0.143932	0.268474	-1.6162	3.92699	SOX2
regulation of cell differentiation (GO:0045595)	3/122	4.68014e-05	0.00130225	9.92415e-05	0.00276458	-1.98777	19.8173	DLX1;FGF8;ISL1			Rap1 signaling pathway_Homo sapiens_hsa04015	1/211	0.119537	0.166458	0.19333	0.268474	-1.78547	3.79256	FGF8
positive regulation of gene expression (GO:0010628)	5/772	5.34257e-05	0.00130225	0.000156544	0.00305529	-1.66129	16.3425	SOX2;FGF8;LHX3;LHX2;FOXA2			Transcriptional misregulation in cancer_Homo sapiens_hsa05202	1/180	0.102838	0.166458	0.16724	0.268474	-1.60841	3.65849	FEV
dopaminergic neuron differentiation (GO:0071542)	2/21	6.88658e-05	0.00134288	0.000132245	0.00305529	-2.27621	21.8137	FGF8;FOXA2			Ras signaling pathway_Homo sapiens_hsa04014	1/227	0.128044	0.166458	0.206519	0.268474	-1.77579	3.64991	FGF8
negative regulation of transcription, DNA-templated (GO:0045892)	5/814	6.88031e-05	0.00134288	0.000200755	0.00343997	-1.75291	16.8003	SOX2;DLX1;FOXG1;SIX3;ISL1			Regulation of actin cytoskeleton_Homo sapiens_hsa04810	1/214	0.121138	0.166458	0.195817	0.268474	-1.72305	3.63706	FGF8
outflow tract septum morphogenesis (GO:0003148)	2/23	8.29116e-05	0.00136626	0.000156682	0.00305529	-2.29325	21.5514	FGF8;ISL1			MAPK signaling pathway_Homo sapiens_hsa04010	1/255	0.142751	0.168705	0.229155	0.27082	-1.74319	3.39339	FGF8
positive regulation of transcription from RNA polymerase II promoter (GO:0045944)	5/849	8.40778e-05	0.00136626	0.000244493	0.0036674	-1.88022	17.6436	SOX2;DLX1;LHX3;ISL1;FOXA2			PI3K-Akt signaling pathway_Homo sapiens_hsa04151	1/341	0.18651	0.202052	0.295255	0.31986	-1.78185	2.9922	FGF8
endocrine system development (GO:0035270)	2/27	0.000114874	0.00172311	0.00021169	0.00343997	-2.07552	18.8284	SOX2;SIX3			Pathways in cancer_Homo sapiens_hsa05200	1/397	0.213893	0.213893	0.335633	0.335633	-1.78946	2.75984	FGF8
positive regulation of nucleic acid-templated transcription (GO:1903508)	4/503	0.000166661	0.00229355	0.000406635	0.00495587	-1.98364	17.2568	SOX2;LHX3;LHX2;FOXA2
negative regulation of neurogenesis (GO:0050768)	2/34	0.000183175	0.00229355	0.000327531	0.00456204	-1.58081	13.603	SOX2;SIX3
positive regulation of cell differentiation (GO:0045597)	3/195	0.000188189	0.00229355	0.000386022	0.00495587	-1.20505	10.337	DLX1;FGF8;ISL1
sensory organ development (GO:0007423)	2/41	0.000267118	0.003064	0.000468098	0.00536935	-1.68613	13.8732	SOX2;SIX3
eye development (GO:0001654)	2/44	0.000307855	0.00333509	0.000535855	0.0058051	-1.53058	12.3761	SOX2;SIX3
gland development (GO:0048732)	2/76	0.000917628	0.00941776	0.00153422	0.0157459	-1.31204	9.17602	SOX2;SIX3
regulation of neuron differentiation (GO:0045664)	2/85	0.00114601	0.0111736	0.00190413	0.0185652	-1.22484	8.29397	SOX2;SIX3
regulation of insulin secretion (GO:0050796)	2/99	0.00154997	0.0143926	0.00255548	0.0237295	-1.284	8.30688	ISL1;FOXA2
brain development (GO:0007420)	2/120	0.00226543	0.02008	0.00370261	0.0328186	-1.2566	7.65269	SIX3;NKX2-2
regulation of glucokinase activity (GO:0033131)	1/7	0.00419308	0.0245842	0.00607775	0.0360228	-3.38864	18.5505	FOXA2
spinal cord motor neuron differentiation (GO:0021522)	1/7	0.00419308	0.0245842	0.00607775	0.0360228	-3.17675	17.3905	ISL1
epithelial to mesenchymal transition involved in endocardial cushion formation (GO:0003198)	1/7	0.00419308	0.0245842	0.00607775	0.0360228	-3.09754	16.9569	FGF8
embryonic camera-type eye morphogenesis (GO:0048596)	1/7	0.00419308	0.0245842	0.00607775	0.0360228	-2.95864	16.1965	SIX3
negative regulation of striated muscle tissue development (GO:0045843)	1/8	0.00479077	0.0245842	0.0068351	0.0360228	-2.73697	14.6183	FGF8
trigeminal nerve development (GO:0021559)	1/7	0.00419308	0.0245842	0.00607775	0.0360228	-2.59556	14.2089	ISL1
forebrain regionalization (GO:0021871)	1/7	0.00419308	0.0245842	0.00607775	0.0360228	-2.4422	13.3694	SIX3
negative regulation of cardiac muscle tissue development (GO:0055026)	1/8	0.00479077	0.0245842	0.0068351	0.0360228	-2.44187	13.0422	FGF8
peripheral nervous system neuron development (GO:0048935)	1/7	0.00419308	0.0245842	0.00607775	0.0360228	-2.27585	12.4587	ISL1
positive regulation of gastrulation (GO:2000543)	1/8	0.00479077	0.0245842	0.0068351	0.0360228	-2.32627	12.4247	FOXA2
neuron fate specification (GO:0048665)	1/8	0.00479077	0.0245842	0.0068351	0.0360228	-2.24013	11.9647	ISL1
neuron differentiation (GO:0030182)	2/140	0.0030667	0.0245842	0.00498036	0.0360228	-1.74046	10.0723	FGF8;FOXA2
lens fiber cell differentiation (GO:0070306)	1/8	0.00479077	0.0245842	0.0068351	0.0360228	-1.79131	9.56749	SIX3
cell differentiation in spinal cord (GO:0021515)	1/8	0.00479077	0.0245842	0.0068351	0.0360228	-1.7462	9.32656	ISL1
positive regulation of cellular process (GO:0048522)	3/520	0.00322673	0.0245842	0.00626636	0.0360228	-1.33516	7.65885	DLX1;FGF8;ISL1
negative regulation of transcription from RNA polymerase II promoter (GO:0000122)	3/566	0.00409828	0.0245842	0.00791822	0.0378928	-1.06851	5.87382	SOX2;DLX1;ISL1
endodermal cell fate commitment (GO:0001711)	1/9	0.00538813	0.0269407	0.00759193	0.0378928	-1.83629	9.59195	SOX2
regulation of cell-cell adhesion mediated by cadherin (GO:2000047)	1/10	0.00598517	0.0277883	0.00834823	0.0378928	-2.83417	14.5066	FOXA2
columnar/cuboidal epithelial cell differentiation (GO:0002065)	1/10	0.00598517	0.0277883	0.00834823	0.0378928	-2.66589	13.6453	FGF8
epithelial cell apoptotic process (GO:1904019)	1/10	0.00598517	0.0277883	0.00834823	0.0378928	-1.92353	9.84551	SIX3
regulation of neuroblast proliferation (GO:1902692)	1/11	0.00658188	0.0279014	0.00910401	0.0378928	-2.78623	13.9965	SIX3
regulation of coagulation (GO:0050818)	1/11	0.00658188	0.0279014	0.00910401	0.0378928	-2.50585	12.588	FOXA2
negative regulation of intracellular estrogen receptor signaling pathway (GO:0033147)	1/11	0.00658188	0.0279014	0.00910401	0.0378928	-2.5039	12.5782	ISL1
neuroepithelial cell differentiation (GO:0060563)	1/11	0.00658188	0.0279014	0.00910401	0.0378928	-2.35239	11.8171	FGF8
atrial septum morphogenesis (GO:0060413)	1/12	0.00717826	0.0281406	0.00985927	0.0378928	-2.63117	12.9893	ISL1
positive regulation of interleukin-1 production (GO:0032732)	1/13	0.00777431	0.0281406	0.010614	0.0378928	-2.65191	12.8801	ISL1
cardiac right ventricle morphogenesis (GO:0003215)	1/13	0.00777431	0.0281406	0.010614	0.0378928	-2.6357	12.8014	ISL1
mesonephros development (GO:0001823)	1/12	0.00717826	0.0281406	0.00985927	0.0378928	-2.55929	12.6344	FGF8
response to interleukin-6 (GO:0070741)	1/13	0.00777431	0.0281406	0.010614	0.0378928	-2.5984	12.6202	FOXA2
regulation of granulocyte macrophage colony-stimulating factor production (GO:0032645)	1/14	0.00837003	0.0281406	0.0113682	0.0378928	-2.6051	12.4604	ISL1
cranial nerve development (GO:0021545)	1/14	0.00837003	0.0281406	0.0113682	0.0378928	-2.50756	11.9939	ISL1
positive regulation of granulocyte macrophage colony-stimulating factor production (GO:0032725)	1/13	0.00777431	0.0281406	0.010614	0.0378928	-2.44849	11.8922	ISL1
atrial septum development (GO:0003283)	1/14	0.00837003	0.0281406	0.0113682	0.0378928	-2.3868	11.4163	ISL1
regulation of interleukin-1 beta production (GO:0032651)	1/14	0.00837003	0.0281406	0.0113682	0.0378928	-2.24952	10.7597	ISL1
neuron fate commitment (GO:0048663)	1/14	0.00837003	0.0281406	0.0113682	0.0378928	-2.22429	10.639	ISL1
central nervous system development (GO:0007417)	2/218	0.00726374	0.0281406	0.0116024	0.0378928	-1.67144	8.23161	SIX3;NKX2-2
epithelial cell development (GO:0002064)	1/17	0.0101552	0.0282896	0.0136277	0.0378928	-2.32808	10.6853	SIX3
pancreas development (GO:0031016)	1/15	0.00896542	0.0282896	0.0121219	0.0378928	-2.25575	10.6344	ISL1
regulation of neural precursor cell proliferation (GO:2000177)	1/15	0.00896542	0.0282896	0.0121219	0.0378928	-2.24912	10.6032	SIX3
mesenchyme morphogenesis (GO:0072132)	1/16	0.00956049	0.0282896	0.0128751	0.0378928	-2.24569	10.4427	ISL1
regulation of gastrulation (GO:0010470)	1/15	0.00896542	0.0282896	0.0121219	0.0378928	-2.18226	10.288	FOXA2
regulation of stem cell proliferation (GO:0072091)	1/17	0.0101552	0.0282896	0.0136277	0.0378928	-2.21257	10.1552	SIX3
cellular response to corticosteroid stimulus (GO:0071384)	1/16	0.00956049	0.0282896	0.0128751	0.0378928	-2.12564	9.88447	ISL1
regulation of protein homodimerization activity (GO:0043496)	1/17	0.0101552	0.0282896	0.0136277	0.0378928	-2.02826	9.30925	ISL1
endocardial cushion morphogenesis (GO:0003203)	1/16	0.00956049	0.0282896	0.0128751	0.0378928	-1.93421	8.99431	ISL1
cardiac epithelial to mesenchymal transition (GO:0060317)	1/17	0.0101552	0.0282896	0.0136277	0.0378928	-1.93998	8.90408	FGF8
regulation of cell cycle phase transition (GO:1901987)	1/17	0.0101552	0.0282896	0.0136277	0.0378928	-1.86688	8.56855	SIX3
mesenchyme development (GO:0060485)	1/17	0.0101552	0.0282896	0.0136277	0.0378928	-1.85137	8.49734	ISL1
cardiac atrium morphogenesis (GO:0003209)	1/18	0.0107496	0.0283268	0.0143798	0.0378928	-2.40415	10.8977	ISL1
cellular response to glucocorticoid stimulus (GO:0071385)	1/18	0.0107496	0.0283268	0.0143798	0.0378928	-2.11915	9.60585	ISL1
pharyngeal system development (GO:0060037)	1/18	0.0107496	0.0283268	0.0143798	0.0378928	-2.08045	9.43045	ISL1
gastrulation (GO:0007369)	1/18	0.0107496	0.0283268	0.0143798	0.0378928	-2.04613	9.27485	FGF8
regulation of cellular response to transforming growth factor beta stimulus (GO:1903844)	1/19	0.0113437	0.0294937	0.0151314	0.0393417	-2.68285	12.0167	DLX1
endocardial cushion development (GO:0003197)	1/20	0.0119375	0.0306291	0.0158825	0.0407512	-2.07663	9.19545	ISL1
dorsal/ventral pattern formation (GO:0009953)	1/21	0.0125309	0.0317341	0.0166331	0.0421227	-1.90774	8.35507	SIX3
ventricular cardiac muscle tissue development (GO:0003229)	1/22	0.013124	0.03281	0.0173831	0.0434578	-1.72243	7.46384	ISL1
regulation of insulin secretion involved in cellular response to glucose stimulus (GO:0061178)	1/23	0.0137168	0.0338579	0.0181326	0.0447577	-2.10291	9.01965	FOXA2
positive regulation of embryonic development (GO:0040019)	1/26	0.0154932	0.0347261	0.0203781	0.0456749	-2.53319	10.5567	FOXA2
positive regulation of interleukin-12 production (GO:0032735)	1/26	0.0154932	0.0347261	0.0203781	0.0456749	-2.15613	8.98535	ISL1
metanephros development (GO:0001656)	1/24	0.0143092	0.0347261	0.0188816	0.0456749	-2.03509	8.6427	FGF8
response to glucocorticoid (GO:0051384)	1/25	0.0149014	0.0347261	0.0196301	0.0456749	-1.83752	7.72915	ISL1
positive regulation of vascular endothelial growth factor production (GO:0010575)	1/25	0.0149014	0.0347261	0.0196301	0.0456749	-1.80172	7.57857	ISL1
glial cell differentiation (GO:0010001)	1/26	0.0154932	0.0347261	0.0203781	0.0456749	-1.81271	7.55419	SOX2
protein import into nucleus, translocation (GO:0000060)	1/26	0.0154932	0.0347261	0.0203781	0.0456749	-1.63725	6.82301	SIX3
negative regulation of epithelial to mesenchymal transition (GO:0010719)	1/26	0.0154932	0.0347261	0.0203781	0.0456749	-1.48289	6.17974	FOXA2
response to growth factor (GO:0070848)	1/27	0.0160846	0.0356421	0.0211255	0.0468122	-1.51707	6.26532	SOX2
regulation of vascular endothelial growth factor production (GO:0010574)	1/28	0.0166758	0.0365368	0.0218724	0.0479227	-2.01973	8.26836	ISL1
negative regulation of intracellular steroid hormone receptor signaling pathway (GO:0033144)	1/29	0.0172666	0.037411	0.0226188	0.0490074	-1.67155	6.78477	ISL1
regulation of embryonic development (GO:0045995)	1/30	0.0178571	0.0382652	0.0233647	0.0500672	-1.72709	6.95214	FOXA2
regulation of blood coagulation (GO:0030193)	1/31	0.0184473	0.0386798	0.0241101	0.0505534	-2.29741	9.17318	FOXA2
regulation of intracellular estrogen receptor signaling pathway (GO:0033146)	1/31	0.0184473	0.0386798	0.0241101	0.0505534	-1.53865	6.14357	ISL1
regulation of interleukin-12 production (GO:0032655)	1/34	0.0202158	0.0390088	0.0263431	0.0507869	-1.91845	7.48443	ISL1
stem cell differentiation (GO:0048863)	1/34	0.0202158	0.0390088	0.0263431	0.0507869	-1.85966	7.25507	SIX3
negative regulation of BMP signaling pathway (GO:0030514)	1/33	0.0196266	0.0390088	0.0255993	0.0507869	-1.80492	7.09491	DLX1
regulation of wound healing (GO:0061041)	1/35	0.0208047	0.0390088	0.0270864	0.0507869	-1.79449	6.94929	FOXA2
bone development (GO:0060348)	1/35	0.0208047	0.0390088	0.0270864	0.0507869	-1.72484	6.67956	FGF8
positive regulation of insulin secretion (GO:0032024)	1/32	0.0190371	0.0390088	0.0248549	0.0507869	-1.65765	6.56654	ISL1
positive regulation of tumor necrosis factor superfamily cytokine production (GO:1903557)	1/33	0.0196266	0.0390088	0.0255993	0.0507869	-1.6592	6.5221	ISL1
positive regulation of interleukin-1 beta production (GO:0032731)	1/32	0.0190371	0.0390088	0.0248549	0.0507869	-1.61167	6.38442	ISL1
central nervous system neuron differentiation (GO:0021953)	1/33	0.0196266	0.0390088	0.0255993	0.0507869	-1.56134	6.13742	ISL1
ventricular cardiac muscle tissue morphogenesis (GO:0055010)	1/35	0.0208047	0.0390088	0.0270864	0.0507869	-1.48105	5.73549	ISL1
positive regulation of cell-cell adhesion (GO:0022409)	1/34	0.0202158	0.0390088	0.0263431	0.0507869	-1.3923	5.43178	FOXA2
regulation of cysteine-type endopeptidase activity (GO:2000116)	1/37	0.0219815	0.0404376	0.0285714	0.0525606	-2.04776	7.81745	SOX2
cardiac muscle tissue morphogenesis (GO:0055008)	1/37	0.0219815	0.0404376	0.0285714	0.0525606	-1.48321	5.66223	ISL1
positive regulation of peptide hormone secretion (GO:0090277)	1/40	0.0237442	0.0432722	0.0307951	0.056122	-1.5178	5.67721	ISL1
regulation of cellular localization (GO:0060341)	1/41	0.0243311	0.0439312	0.0315354	0.0569388	-1.44383	5.36529	FOXA2
odontogenesis (GO:0042476)	1/42	0.0249177	0.0441724	0.0322751	0.0572149	-1.62395	5.9959	FGF8
mesenchymal cell differentiation (GO:0048762)	1/42	0.0249177	0.0441724	0.0322751	0.0572149	-1.53145	5.65439	ISL1
regulation of interleukin-6 production (GO:0032675)	1/43	0.025504	0.0442395	0.0330142	0.0572332	-1.84972	6.78647	ISL1
regulation of interferon-gamma production (GO:0032649)	1/44	0.02609	0.0442395	0.0337529	0.0572332	-1.79388	6.54086	ISL1
positive regulation of interferon-gamma production (GO:0032729)	1/44	0.02609	0.0442395	0.0337529	0.0572332	-1.70073	6.20119	ISL1
cardiac ventricle morphogenesis (GO:0003208)	1/44	0.02609	0.0442395	0.0337529	0.0572332	-1.55524	5.67074	ISL1
positive regulation of interleukin-6 production (GO:0032755)	1/44	0.02609	0.0442395	0.0337529	0.0572332	-1.46482	5.34103	ISL1
negative regulation of nucleic acid-templated transcription (GO:1903507)	2/445	0.0281304	0.0472881	0.0436902	0.0692573	-1.1362	4.05726	FOXG1;SIX3
positive regulation of tumor necrosis factor production (GO:0032760)	1/48	0.0284306	0.0473843	0.0367025	0.0616981	-1.64663	5.86248	ISL1
gonad development (GO:0008406)	1/50	0.0295989	0.0489135	0.0381742	0.0636236	-1.84247	6.48552	FGF8
heart morphogenesis (GO:0003007)	1/51	0.0301826	0.049459	0.0389092	0.0642992	-1.43926	5.0381	ISL1
negative regulation of cellular response to transforming growth factor beta stimulus (GO:1903845)	1/54	0.0319318	0.0518892	0.0411114	0.0673675	-1.61966	5.57836	DLX1
positive regulation of intracellular signal transduction (GO:1902533)	2/480	0.032356	0.052144	0.0500755	0.0762869	-1.43002	4.90634	SOX2;FGF8
negative regulation of cellular response to growth factor stimulus (GO:0090288)	1/56	0.0330963	0.0528999	0.042577	0.0691877	-1.40042	4.77309	DLX1
regulation of BMP signaling pathway (GO:0030510)	1/57	0.0336781	0.0529615	0.043309	0.0692235	-1.53099	5.19143	DLX1
chordate embryonic development (GO:0043009)	1/57	0.0336781	0.0529615	0.043309	0.0692235	-1.37039	4.64687	ISL1
regulation of neurogenesis (GO:0050767)	1/58	0.0342595	0.0534449	0.0440406	0.0692573	-1.23248	4.15814	SIX3
regulation of tumor necrosis factor production (GO:0032680)	1/62	0.0365821	0.0561694	0.0469615	0.07326	-1.30393	4.31367	ISL1
negative regulation of cellular macromolecule biosynthetic process (GO:2000113)	2/513	0.0365596	0.0561694	0.0563972	0.0826876	-0.973654	3.22164	FOXG1;SIX3
kidney development (GO:0001822)	1/64	0.0377415	0.0570511	0.048419	0.0743441	-1.70247	5.579	FGF8
negative regulation of neuron apoptotic process (GO:0043524)	1/64	0.0377415	0.0570511	0.048419	0.0743441	-1.21026	3.96601	ISL1
negative regulation of epithelial cell proliferation (GO:0050680)	1/67	0.0394782	0.0592173	0.0506014	0.0764904	-1.38187	4.46623	SOX2
negative regulation of protein binding (GO:0032091)	1/68	0.0400564	0.059626	0.0513278	0.0769917	-1.19	3.82879	ISL1
regulation of epithelial to mesenchymal transition (GO:0010717)	1/69	0.0406344	0.060028	0.0520538	0.0774846	-1.26191	4.04206	FOXA2
regulation of epithelial cell proliferation (GO:0050678)	1/73	0.0429429	0.0629614	0.0549525	0.0811798	-2.01122	6.3311	SOX2
negative regulation of inflammatory response (GO:0050728)	1/79	0.0463962	0.0660383	0.0592854	0.0843844	-1.6845	5.17232	ISL1
negative regulation of transmembrane receptor protein serine/threonine kinase signaling pathway (GO:0090101)	1/78	0.0458214	0.0660383	0.0585645	0.0843844	-1.5141	4.66797	DLX1
fibroblast growth factor receptor signaling pathway (GO:0008543)	1/79	0.0463962	0.0660383	0.0592854	0.0843844	-1.34234	4.1217	FGF8
visual perception (GO:0007601)	1/79	0.0463962	0.0660383	0.0592854	0.0843844	-1.19752	3.67704	SIX3
negative regulation of defense response (GO:0031348)	1/81	0.0475447	0.0671827	0.0607257	0.0858081	-1.59896	4.87058	ISL1
sensory perception of light stimulus (GO:0050953)	1/82	0.0481185	0.0675044	0.0614451	0.0862	-1.70766	5.18118	SIX3
positive regulation of protein secretion (GO:0050714)	1/83	0.048692	0.067821	0.062164	0.0865856	-1.19367	3.60756	ISL1
negative regulation of neuron death (GO:1901215)	1/84	0.0492651	0.0681326	0.0628824	0.0869651	-1.27938	3.85164	ISL1
cellular response to BMP stimulus (GO:0071773)	1/88	0.0515546	0.0703018	0.065751	0.0902919	-1.51272	4.48538	DLX1
negative regulation of gene expression (GO:0010629)	2/619	0.0514042	0.0703018	0.0785015	0.100051	-1.11936	3.32231	FOXG1;SIX3
regulation of neuron apoptotic process (GO:0043523)	1/90	0.0526975	0.0713612	0.0671823	0.0916123	-1.16784	3.43717	ISL1
regulation of cell cycle process (GO:0010564)	1/91	0.0532684	0.0716369	0.0678972	0.0919442	-1.43077	4.19561	SIX3
regulation of cysteine-type endopeptidase activity involved in apoptotic process (GO:0043281)	1/94	0.0549794	0.0734314	0.0700389	0.0941903	-1.23717	3.58879	SOX2
cellular response to fibroblast growth factor stimulus (GO:0044344)	1/95	0.0555491	0.0736876	0.0707519	0.0944973	-1.70225	4.92033	FGF8
epithelial cell differentiation (GO:0030855)	1/97	0.0566875	0.0746896	0.0721762	0.0957439	-1.2318	3.53552	SIX3
positive regulation of neuron differentiation (GO:0045666)	1/99	0.0578247	0.0756766	0.0735985	0.0969711	-1.07679	3.06921	DLX1
cellular response to transforming growth factor beta stimulus (GO:0071560)	1/101	0.0589606	0.0766488	0.0750189	0.0981791	-1.77642	5.02885	DLX1
positive regulation of angiogenesis (GO:0045766)	1/104	0.0606621	0.0778231	0.0771457	0.0996253	-1.41614	3.96864	ISL1
protein import into nucleus (GO:0006606)	1/104	0.0606621	0.0778231	0.0771457	0.0996253	-1.23111	3.4501	SIX3
positive regulation of vasculature development (GO:1904018)	1/105	0.0612287	0.0780366	0.0778537	0.0998781	-1.86646	5.21328	ISL1
regulation of response to external stimulus (GO:0032101)	1/108	0.0629265	0.0791655	0.0799746	0.100613	-1.10714	3.06212	FOXA2
negative regulation of response to external stimulus (GO:0032102)	1/108	0.0629265	0.0791655	0.0799746	0.100613	-1.1007	3.04429	ISL1
circulatory system development (GO:0072359)	1/110	0.0640567	0.0800709	0.0813861	0.101733	-1.44316	3.96577	ISL1
negative regulation of multicellular organismal process (GO:0051241)	1/126	0.0730541	0.090736	0.0926072	0.115022	-1.03338	2.7039	FOXA2
negative regulation of response to stimulus (GO:0048585)	1/128	0.0741732	0.0909671	0.0940011	0.115284	-1.21131	3.15103	FOXA2
positive regulation of protein kinase B signaling (GO:0051897)	1/128	0.0741732	0.0909671	0.0940011	0.115284	-1.09747	2.85491	FGF8
regulation of macromolecule metabolic process (GO:0060255)	1/130	0.075291	0.0917609	0.095393	0.11626	-1.17094	3.02851	SOX2
generation of neurons (GO:0048699)	1/131	0.0758495	0.0918674	0.0960882	0.11638	-1.29061	3.32848	SIX3
response to cytokine (GO:0034097)	1/139	0.080306	0.0966646	0.101632	0.122335	-1.1419	2.87978	FOXA2
cellular response to growth factor stimulus (GO:0071363)	1/140	0.0808617	0.0967364	0.102323	0.122411	-1.30017	3.26994	DLX1
negative regulation of sequence-specific DNA binding transcription factor activity (GO:0043433)	1/141	0.081417	0.0968069	0.103014	0.122486	-1.57897	3.96033	FOXA2
skeletal system development (GO:0001501)	1/147	0.0847428	0.100151	0.107146	0.126627	-1.32591	3.27252	FGF8
negative regulation of canonical Wnt signaling pathway (GO:0090090)	1/149	0.0858489	0.100847	0.108519	0.127478	-1.25682	3.08571	SOX2
heart development (GO:0007507)	1/150	0.0864016	0.100888	0.109205	0.127515	-1.5953	3.9065	ISL1
negative regulation of cell differentiation (GO:0045596)	1/151	0.0869539	0.100929	0.109891	0.127552	-1.61404	3.94209	FOXA2
regulation of protein kinase B signaling (GO:0051896)	1/164	0.094106	0.108584	0.11876	0.13703	-1.13727	2.68775	FGF8
regulation of inflammatory response (GO:0050727)	1/167	0.0957492	0.10983	0.120795	0.138559	-0.915695	2.14824	ISL1
negative regulation of Wnt signaling pathway (GO:0030178)	1/175	0.100118	0.114169	0.126201	0.143914	-1.50062	3.45354	SOX2
regulation of angiogenesis (GO:0045765)	1/178	0.101751	0.115357	0.128221	0.145367	-1.5485	3.53868	ISL1
positive regulation of multicellular organismal process (GO:0051240)	1/203	0.115255	0.129766	0.144886	0.163113	-1.49522	3.23059	FOXA2
regulation of MAPK cascade (GO:0043408)	1/204	0.115792	0.129766	0.145547	0.163113	-1.22914	2.64998	SOX2
regulation of canonical Wnt signaling pathway (GO:0060828)	1/214	0.121138	0.134983	0.152127	0.169513	-1.1884	2.5085	SOX2
positive regulation of sequence-specific DNA binding transcription factor activity (GO:0051091)	1/216	0.122204	0.135396	0.153437	0.170002	-1.14883	2.41491	NKX2-2
positive regulation of cytokine production (GO:0001819)	1/221	0.124863	0.137561	0.156705	0.172642	-1.69929	3.53543	ISL1
regulation of gene expression (GO:0010468)	2/1038	0.125891	0.137758	0.18525	0.201809	-1.58183	3.27809	SOX2;FGF8
axonogenesis (GO:0007409)	1/224	0.126455	0.137758	0.158661	0.173814	-1.45246	3.00349	ISL1
positive regulation of macromolecule metabolic process (GO:0010604)	1/277	0.154146	0.166991	0.192533	0.208577	-1.5736	2.9424	FGF8
MAPK cascade (GO:0000165)	1/279	0.155175	0.167177	0.193786	0.208775	-0.985694	1.83655	FGF8
positive regulation of MAPK cascade (GO:0043410)	1/290	0.160814	0.1723	0.200649	0.214982	-0.979276	1.78964	SOX2
intracellular protein transport (GO:0006886)	1/348	0.18998	0.202438	0.235966	0.251439	-1.4181	2.35522	SIX3
transcription, DNA-templated (GO:0006351)	1/357	0.194422	0.206045	0.241317	0.255744	-1.58483	2.59551	FEV
negative regulation of cell proliferation (GO:0008285)	1/364	0.197861	0.208556	0.245456	0.258724	-1.57806	2.55676	SOX2
transmembrane receptor protein tyrosine kinase signaling pathway (GO:0007169)	1/397	0.213893	0.224243	0.264691	0.277498	-1.46539	2.26004	FGF8
positive regulation of protein phosphorylation (GO:0001934)	1/413	0.22156	0.231039	0.273855	0.285571	-1.58958	2.3956	SOX2
cellular response to cytokine stimulus (GO:0071345)	1/457	0.242293	0.251315	0.298525	0.30964	-0.99447	1.40977	SOX2
transcription from RNA polymerase II promoter (GO:0006366)	1/486	0.25568	0.262408	0.314365	0.322638	-1.04585	1.42636	FEV
negative regulation of apoptotic process (GO:0043066)	1/486	0.25568	0.262408	0.314365	0.322638	-0.922522	1.25816	ISL1
regulation of nucleic acid-templated transcription (GO:1903506)	1/608	0.309655	0.31614	0.377505	0.385411	-1.75169	2.0535	SOX2
cytokine-mediated signaling pathway (GO:0019221)	1/634	0.320683	0.324007	0.390258	0.394302	-1.16911	1.32963	SOX2
regulation of cellular macromolecule biosynthetic process (GO:2000112)	1/632	0.319841	0.324007	0.389285	0.394302	-1.15512	1.31675	SOX2
regulation of cell proliferation (GO:0042127)	1/741	0.364392	0.36627	0.440279	0.442548	-0.975478	0.984771	SIX3
regulation of apoptotic process (GO:0042981)	1/816	0.393475	0.393475	0.473084	0.473084	-1.47748	1.3781	SOX2

## Sheet: Blue Module
Supplementary file S7. List of GO terms and KEGG pathways for different moduls in intergrated network.
GO Terms	Overlap	P-value	Adjusted P-value	Old P-value	Old Adjusted P-value	Z-score	Combined Score	Genes			KEGG pathway	Overlap	P-value	Adjusted P-value	Old P-value	Old Adjusted P-value	Z-score	Combined Score	Genes
phospholipase C-activating G-protein coupled receptor signaling pathway (GO:0007200)	4/92	2.89364e-08	3.55917e-06	6.32305e-08	7.77736e-06	-1.20752	20.9603	UTS2R;CCKAR;GRM1;F2RL3			Neuroactive ligand-receptor interaction_Homo sapiens_hsa04080	7/277	3.18711e-12	7.01165e-11	1.65618e-10	3.64359e-09	-1.89338	50.1215	UTS2R;CCKAR;F2;TSHR;GRM1;TRHR;F2RL3
positive regulation of calcium ion transmembrane transport (GO:1904427)	2/26	4.52843e-05	0.00180728	7.56883e-05	0.00292608	-2.40094	24.0156	F2;F2RL3			Calcium signaling pathway_Homo sapiens_hsa04020	3/180	5.78711e-05	0.000636582	0.000565327	0.0062186	-1.93265	18.8574	CCKAR;GRM1;TRHR
positive regulation of release of sequestered calcium ion into cytosol (GO:0051281)	2/32	6.90279e-05	0.00180728	0.000112175	0.00292608	-1.95127	18.6951	F2;F2RL3			Complement and coagulation cascades_Homo sapiens_hsa04610	2/79	0.000544727	0.00399467	0.00266205	0.0195217	-1.75892	13.2187	F2;F2RL3
positive regulation of cytosolic calcium ion concentration involved in phospholipase C-activating G-protein coupled signaling pathway (GO:0051482)	2/29	5.65366e-05	0.00180728	9.30441e-05	0.00292608	-1.72927	16.9134	GRM1;F2RL3			Autoimmune thyroid disease_Homo sapiens_hsa05320	1/53	0.0236034	0.0700093	0.0526633	0.153154	-1.77611	6.65394	TSHR
positive regulation of calcium ion transport into cytosol (GO:0010524)	2/33	7.34666e-05	0.00180728	0.000118946	0.00292608	-1.77061	16.8539	F2;F2RL3			Regulation of lipolysis in adipocytes_Homo sapiens_hsa04923	1/56	0.0249245	0.0700093	0.055518	0.153154	-1.79186	6.61536	TSHR
regulation of release of sequestered calcium ion into cytosol (GO:0051279)	2/50	0.000169869	0.00348232	0.000264041	0.00541285	-1.89832	16.4783	F2;F2RL3			Long-term depression_Homo sapiens_hsa04730	1/60	0.0266835	0.0700093	0.0593127	0.153154	-1.7625	6.38678	GRM1
positive regulation of cytosolic calcium ion concentration (GO:0007204)	2/134	0.00121506	0.0213504	0.00179279	0.0315019	-1.29647	8.70314	GRM1;F2RL3			Long-term potentiation_Homo sapiens_hsa04720	1/66	0.0293168	0.0700093	0.0649803	0.153154	-1.6811	5.93359	GRM1
adenylate cyclase-inhibiting G-protein coupled glutamate receptor signaling pathway (GO:0007196)	1/7	0.00279706	0.0255303	0.00387248	0.0333005	-3.58795	21.0942	GRM1			Thyroid hormone synthesis_Homo sapiens_hsa04918	1/71	0.0315063	0.0700093	0.0696809	0.153154	-1.64171	5.67631	TSHR
platelet dense granule organization (GO:0060155)	1/7	0.00279706	0.0255303	0.00387248	0.0333005	-3.1119	18.2954	F2RL3			Taste transduction_Homo sapiens_hsa04742	1/83	0.0367432	0.0700093	0.0808798	0.153154	-1.67578	5.53643	GRM1
negative regulation of glial cell differentiation (GO:0045686)	1/9	0.00359496	0.0255303	0.00483859	0.0333005	-3.10174	17.4573	F2			Insulin secretion_Homo sapiens_hsa04911	1/85	0.0376136	0.0700093	0.082735	0.153154	-1.62568	5.33287	CCKAR
positive regulation of hemostasis (GO:1900048)	1/10	0.0039937	0.0255303	0.00532134	0.0333005	-2.60843	14.4064	F2			Estrogen signaling pathway_Homo sapiens_hsa04915	1/99	0.0436866	0.0700093	0.0956318	0.153154	-1.58615	4.96579	GRM1
dimeric G-protein coupled receptor signaling pathway (GO:0038042)	1/9	0.00359496	0.0255303	0.00483859	0.0333005	-2.53061	14.2428	GRM1			Gap junction_Homo sapiens_hsa04540	1/88	0.0389178	0.0700093	0.0855118	0.153154	-1.5046	4.88438	GRM1
negative regulation of fibrinolysis (GO:0051918)	1/10	0.0039937	0.0255303	0.00532134	0.0333005	-2.51957	13.9157	F2			Retrograde endocannabinoid signaling_Homo sapiens_hsa04723	1/101	0.0445514	0.0700093	0.0974614	0.153154	-1.56643	4.87334	GRM1
secretory granule organization (GO:0033363)	1/10	0.0039937	0.0255303	0.00532134	0.0333005	-2.51722	13.9027	F2RL3			Pancreatic secretion_Homo sapiens_hsa04972	1/96	0.0423881	0.0700093	0.0928814	0.153154	-1.42475	4.50347	CCKAR
regulation of coagulation (GO:0050818)	1/11	0.00439231	0.0255303	0.00580389	0.0333005	-2.53477	13.7585	F2			Glutamatergic synapse_Homo sapiens_hsa04724	1/114	0.0501556	0.0735615	0.109277	0.160163	-1.55498	4.65346	GRM1
protein carboxylation (GO:0018214)	1/12	0.00479077	0.0255303	0.00628625	0.0333005	-2.5732	13.7436	F2			Platelet activation_Homo sapiens_hsa04611	1/122	0.0535898	0.073686	0.116482	0.160163	-1.52041	4.44933	F2RL3
negative regulation of cytokine production involved in inflammatory response (GO:1900016)	1/10	0.0039937	0.0255303	0.00532134	0.0333005	-2.48258	13.7114	F2			FoxO signaling pathway_Homo sapiens_hsa04068	1/133	0.0582938	0.075439	0.126307	0.163456	-1.41963	4.03495	GRM1
regulation of lipid kinase activity (GO:0043550)	1/12	0.00479077	0.0255303	0.00628625	0.0333005	-2.54696	13.6035	F2			Phospholipase D signaling pathway_Homo sapiens_hsa04072	1/144	0.062977	0.0769719	0.136039	0.16627	-1.46345	4.04641	GRM1
positive regulation of lyase activity (GO:0051349)	1/13	0.00518909	0.0255303	0.0067684	0.0333005	-2.54298	13.3791	TSHR			cAMP signaling pathway_Homo sapiens_hsa04024	1/199	0.086084	0.0966924	0.183315	0.205142	-1.4793	3.62787	TSHR
negative regulation of cell activation (GO:0050866)	1/11	0.00439231	0.0255303	0.00580389	0.0333005	-2.45087	13.3031	F2			Rap1 signaling pathway_Homo sapiens_hsa04015	1/211	0.0910577	0.0966924	0.19333	0.205142	-1.48394	3.55591	F2RL3
peptidyl-glutamic acid carboxylation (GO:0017187)	1/12	0.00479077	0.0255303	0.00628625	0.0333005	-2.33715	12.4829	F2			Regulation of actin cytoskeleton_Homo sapiens_hsa04810	1/214	0.0922973	0.0966924	0.195817	0.205142	-1.42627	3.39842	F2
positive regulation of coagulation (GO:0050820)	1/10	0.0039937	0.0255303	0.00532134	0.0333005	-2.02936	11.2083	F2			Pathways in cancer_Homo sapiens_hsa05200	1/397	0.165133	0.165133	0.335633	0.335633	-1.54922	2.79014	F2RL3
regulation of hormone secretion (GO:0046883)	1/13	0.00518909	0.0255303	0.0067684	0.0333005	-1.91893	10.0958	CCKAR
regulation of astrocyte differentiation (GO:0048710)	1/11	0.00439231	0.0255303	0.00580389	0.0333005	-1.69724	9.21245	F2
positive regulation of cyclase activity (GO:0031281)	1/13	0.00518909	0.0255303	0.0067684	0.0333005	-1.58393	8.33337	TSHR
regulation of fibrinolysis (GO:0051917)	1/14	0.00558727	0.0261712	0.00725035	0.033676	-2.26407	11.7443	F2
G-protein coupled glutamate receptor signaling pathway (GO:0007216)	1/16	0.00638322	0.0261712	0.00821365	0.033676	-2.2272	11.2565	GRM1
negative regulation of platelet activation (GO:0010544)	1/16	0.00638322	0.0261712	0.00821365	0.033676	-2.15019	10.8672	F2
positive regulation of collagen metabolic process (GO:0010714)	1/16	0.00638322	0.0261712	0.00821365	0.033676	-2.10881	10.6581	F2
positive regulation of collagen biosynthetic process (GO:0032967)	1/16	0.00638322	0.0261712	0.00821365	0.033676	-1.85196	9.35994	F2
positive regulation of G-protein coupled receptor protein signaling pathway (GO:0045745)	1/18	0.00717861	0.0265063	0.00917615	0.0337015	-2.40252	11.8604	F2
fibrinolysis (GO:0042730)	1/17	0.00678099	0.0265063	0.008695	0.0337015	-2.2639	11.3051	F2
positive regulation of cyclic nucleotide biosynthetic process (GO:0030804)	1/19	0.0075761	0.0265063	0.0096571	0.0337015	-2.25806	11.0255	TSHR
regulation of cAMP biosynthetic process (GO:0030817)	1/20	0.00797345	0.0265063	0.0101378	0.0337015	-2.01708	9.74579	TSHR
regulation of platelet activation (GO:0010543)	1/20	0.00797345	0.0265063	0.0101378	0.0337015	-1.95712	9.45609	F2
regulation of collagen biosynthetic process (GO:0032965)	1/18	0.00717861	0.0265063	0.00917615	0.0337015	-1.91204	9.43908	F2
positive regulation of blood coagulation (GO:0030194)	1/20	0.00797345	0.0265063	0.0101378	0.0337015	-1.914	9.24774	F2
positive regulation of cAMP biosynthetic process (GO:0030819)	1/21	0.00837065	0.0270945	0.0106184	0.0343701	-2.22897	10.6612	TSHR
positive regulation of lipid metabolic process (GO:0045834)	1/22	0.00876772	0.027652	0.0110987	0.0350037	-1.51151	7.15952	F2
regulation of cytokine production involved in inflammatory response (GO:1900015)	1/23	0.00916465	0.0281813	0.0115789	0.0356051	-1.87699	8.80759	F2
signal peptide processing (GO:0006465)	1/26	0.0103546	0.0285647	0.0130181	0.0358151	-2.06105	9.41967	F2
positive regulation of wound healing (GO:0090303)	1/27	0.010751	0.0285647	0.0134975	0.0358151	-2.04992	9.29181	F2
positive regulation of purine nucleotide biosynthetic process (GO:1900373)	1/25	0.00995809	0.0285647	0.0125386	0.0358151	-1.81701	8.37528	TSHR
peptidyl-glutamic acid modification (GO:0018200)	1/28	0.0111472	0.0285647	0.0139766	0.0358151	-1.8388	8.2683	F2
regulation of protein localization to nucleus (GO:1900180)	1/28	0.0111472	0.0285647	0.0139766	0.0358151	-1.82366	8.20023	F2
positive regulation of Rho protein signal transduction (GO:0035025)	1/26	0.0103546	0.0285647	0.0130181	0.0358151	-1.76415	8.06274	F2RL3
positive regulation of cAMP metabolic process (GO:0030816)	1/27	0.010751	0.0285647	0.0134975	0.0358151	-1.67092	7.57387	TSHR
positive regulation of lipid kinase activity (GO:0090218)	1/28	0.0111472	0.0285647	0.0139766	0.0358151	-1.60121	7.19993	F2
regulation of adenylate cyclase activity (GO:0045761)	1/29	0.0115433	0.0289761	0.0144556	0.0362865	-2.5201	11.2438	TSHR
regulation of blood coagulation (GO:0030193)	1/31	0.0123351	0.0303443	0.0154129	0.0379157	-2.36744	10.4056	F2
activation of adenylate cyclase activity (GO:0007190)	1/33	0.0131263	0.0316576	0.0163694	0.0394628	-1.65903	7.18878	TSHR
positive regulation of adenylate cyclase activity (GO:0045762)	1/34	0.0135217	0.0316998	0.0168474	0.0394628	-2.01792	8.68402	TSHR
regulation of wound healing (GO:0061041)	1/35	0.013917	0.0316998	0.0173251	0.0394628	-1.83094	7.82663	F2
response to peptide (GO:1901652)	1/35	0.013917	0.0316998	0.0173251	0.0394628	-1.65258	7.06418	CCKAR
glutamate receptor signaling pathway (GO:0007215)	1/37	0.0147071	0.0323031	0.01828	0.0401508	-1.96325	8.28377	GRM1
negative regulation of blood coagulation (GO:0030195)	1/37	0.0147071	0.0323031	0.01828	0.0401508	-1.45466	6.13784	F2
positive regulation of Ras protein signal transduction (GO:0046579)	1/41	0.0162856	0.0339514	0.0201875	0.0420857	-1.62932	6.70868	F2RL3
neuron migration (GO:0001764)	1/41	0.0162856	0.0339514	0.0201875	0.0420857	-1.58633	6.53166	CCK
positive regulation of reactive oxygen species metabolic process (GO:2000379)	1/40	0.0158912	0.0339514	0.0197109	0.0420857	-1.46414	6.06445	F2
negative regulation of proteolysis (GO:0045861)	1/42	0.0166799	0.0341939	0.0206638	0.0423609	-1.7928	7.3389	F2
positive regulation of protein localization to nucleus (GO:1900182)	1/43	0.0170741	0.0344281	0.02114	0.0426266	-1.73176	7.04861	F2
regulation of synaptic transmission, glutamatergic (GO:0051966)	1/46	0.0182557	0.036217	0.0225673	0.0447706	-1.38139	5.53009	GRM1
regulation of reactive oxygen species metabolic process (GO:2000377)	1/50	0.0198293	0.0381095	0.0244676	0.0470237	-1.58205	6.20256	F2
antimicrobial humoral immune response mediated by antimicrobial peptide (GO:0061844)	1/50	0.0198293	0.0381095	0.0244676	0.0470237	-1.45097	5.68868	F2
blood circulation (GO:0008015)	1/51	0.0202224	0.0382669	0.0249422	0.0471983	-1.86884	7.2903	UTS2R
response to organonitrogen compound (GO:0010243)	1/52	0.0206153	0.0384194	0.0254166	0.0473672	-1.5451	5.99766	CCKAR
positive regulation of protein import into nucleus (GO:0042307)	1/54	0.0214007	0.0392878	0.0263647	0.0484009	-1.45048	5.57612	F2
regulation of secretion by cell (GO:1903530)	1/57	0.0225778	0.0408392	0.0277855	0.0502591	-1.7045	6.46138	CCKAR
regulation of Rho protein signal transduction (GO:0035023)	1/58	0.0229699	0.0409463	0.0282587	0.0503742	-1.97143	7.43935	F2RL3
adenylate cyclase-inhibiting G-protein coupled receptor signaling pathway (GO:0007193)	1/64	0.0253195	0.0438633	0.0310937	0.0538666	-1.46401	5.38197	GRM1
regulation of proteolysis (GO:0030162)	1/64	0.0253195	0.0438633	0.0310937	0.0538666	-1.26315	4.64357	F2
positive regulation of JAK-STAT cascade (GO:0046427)	1/65	0.0257106	0.0439223	0.0315656	0.0539245	-1.44018	5.27228	F2
positive regulation of cellular protein localization (GO:1903829)	1/67	0.0264924	0.044638	0.0325086	0.0547747	-1.24924	4.53588	F2
regulation of cell communication (GO:0010646)	1/72	0.0284446	0.0460354	0.0348627	0.0564226	-1.60363	5.7086	CCKAR
defense response to Gram-negative bacterium (GO:0050829)	1/72	0.0284446	0.0460354	0.0348627	0.0564226	-1.42684	5.07926	F2
neuropeptide signaling pathway (GO:0007218)	1/71	0.0280545	0.0460354	0.0343923	0.0564226	-1.24834	4.46107	UTS2R
cAMP-mediated signaling (GO:0019933)	1/76	0.0300039	0.0479283	0.0367425	0.0586926	-1.48284	5.19946	TSHR
negative regulation of inflammatory response (GO:0050728)	1/79	0.0311719	0.0485335	0.0381503	0.0593986	-1.75699	6.09366	F2
adenylate cyclase-activating G-protein coupled receptor signaling pathway (GO:0007189)	1/79	0.0311719	0.0485335	0.0381503	0.0593986	-1.60556	5.56846	TSHR
cellular response to hormone stimulus (GO:0032870)	1/81	0.0319499	0.049123	0.0390879	0.0600976	-1.24089	4.27311	CCKAR
modulation of chemical synaptic transmission (GO:0050804)	1/83	0.0327274	0.0496972	0.0400246	0.0607781	-1.34901	4.61301	GRM1
negative regulation of cellular protein metabolic process (GO:0032269)	1/90	0.0354442	0.0531001	0.0432971	0.0648548	-1.38022	4.60967	F2
positive regulation of response to external stimulus (GO:0032103)	1/91	0.0358317	0.0531001	0.0437638	0.0648548	-1.25334	4.17228	F2
positive regulation of cellular metabolic process (GO:0031325)	1/93	0.0366065	0.0536023	0.0446967	0.0654487	-1.47729	4.88619	F2
axon development (GO:0061564)	1/95	0.0373806	0.054092	0.0456287	0.0660275	-1.19721	3.93474	CCK
cellular response to organonitrogen compound (GO:0071417)	1/98	0.0385409	0.0544889	0.0470254	0.0664842	-1.33539	4.34808	TSHR
cell morphogenesis involved in neuron differentiation (GO:0048667)	1/98	0.0385409	0.0544889	0.0470254	0.0664842	-1.22211	3.97924	CCK
protein processing (GO:0016485)	1/102	0.040086	0.0560293	0.0488848	0.0683277	-1.39916	4.5007	F2
regulation of protein activation cascade (GO:2000257)	1/109	0.0427847	0.0569915	0.0521314	0.069426	-1.92854	6.07795	F2
cellular response to peptide hormone stimulus (GO:0071375)	1/111	0.0435545	0.0569915	0.0530573	0.069426	-1.73044	5.42277	TSHR
regulation of complement activation (GO:0030449)	1/110	0.0431697	0.0569915	0.0525944	0.069426	-1.29258	4.06208	F2
negative regulation of cytokine production (GO:0001818)	1/111	0.0435545	0.0569915	0.0530573	0.069426	-1.25502	3.93292	F2
peptide metabolic process (GO:0006518)	1/105	0.0412434	0.0569915	0.0502774	0.069426	-1.22008	3.88994	F2
regulation of response to external stimulus (GO:0032101)	1/108	0.0423996	0.0569915	0.0516682	0.069426	-1.14748	3.62676	F2
regulation of immune effector process (GO:0002697)	1/115	0.0450926	0.0571792	0.0549066	0.0696239	-2.68933	8.33434	F2
regulation of humoral immune response (GO:0002920)	1/114	0.0447082	0.0571792	0.0544446	0.0696239	-2.12193	6.5941	F2
positive regulation of kinase activity (GO:0033674)	1/114	0.0447082	0.0571792	0.0544446	0.0696239	-1.79865	5.58949	F2
regulation of acute inflammatory response (GO:0002673)	1/122	0.0477789	0.0599674	0.0581356	0.0729661	-1.4864	4.52039	F2
cellular calcium ion homeostasis (GO:0006874)	1/124	0.0485452	0.0603138	0.0590564	0.0733731	-1.17453	3.55326	F2
G-protein coupled receptor signaling pathway, coupled to cyclic nucleotide second messenger (GO:0007187)	1/126	0.049311	0.0606525	0.0599764	0.073771	-1.59476	4.79961	TSHR
regulation of protein processing (GO:0070613)	1/129	0.0504587	0.0614497	0.0613551	0.0747195	-1.70412	5.08954	F2
generation of neurons (GO:0048699)	1/131	0.0512231	0.061769	0.0622732	0.0750941	-1.34529	3.99763	CCK
adenylate cyclase-modulating G-protein coupled receptor signaling pathway (GO:0007188)	1/135	0.0527503	0.0623874	0.0641071	0.075819	-1.22418	3.60178	TSHR
cellular response to organic substance (GO:0071310)	1/134	0.0523687	0.0623874	0.0636489	0.075819	-1.0707	3.15797	CCKAR
regulation of cytosolic calcium ion concentration (GO:0051480)	1/138	0.0538944	0.0631334	0.0654805	0.0767058	-1.07595	3.14256	F2
positive regulation of macromolecule biosynthetic process (GO:0010557)	1/143	0.0557984	0.0647472	0.0677657	0.0786338	-1.37843	3.97816	F2
neuron projection morphogenesis (GO:0048812)	1/164	0.0637587	0.0726141	0.0773114	0.0880491	-1.46169	4.02352	CCK
positive regulation of protein modification process (GO:0031401)	1/164	0.0637587	0.0726141	0.0773114	0.0880491	-1.00265	2.75994	F2
ER to Golgi vesicle-mediated transport (GO:0006888)	1/181	0.0701597	0.079171	0.0849773	0.0958918	-1.49971	3.9847	F2
positive regulation of phosphorylation (GO:0042327)	1/209	0.080619	0.0901467	0.0974846	0.109005	-1.7617	4.43599	F2
axonogenesis (GO:0007409)	1/224	0.0861798	0.0954965	0.104124	0.115381	-1.55256	3.80582	CCK
anterograde trans-synaptic signaling (GO:0098916)	1/241	0.0924464	0.101526	0.111599	0.12256	-1.12518	2.6792	GRM1
regulation of protein phosphorylation (GO:0001932)	1/262	0.100136	0.108997	0.120758	0.131445	-1.08526	2.49744	F2
Golgi vesicle transport (GO:0048193)	1/272	0.103777	0.11197	0.125091	0.134967	-1.47525	3.3422	F2
cellular response to oxygen-containing compound (GO:1901701)	1/275	0.104867	0.112162	0.126388	0.13518	-1.08463	2.44592	TSHR
proteolysis (GO:0006508)	1/292	0.111021	0.116714	0.133703	0.140559	-1.68136	3.69569	F2
chemical synaptic transmission (GO:0007268)	1/290	0.110299	0.116714	0.132845	0.140559	-1.24308	2.74043	GRM1
positive regulation of protein phosphorylation (GO:0001934)	1/413	0.153766	0.160281	0.184267	0.192075	-1.70788	3.1977	F2
positive regulation of cell proliferation (GO:0008284)	1/425	0.157905	0.163213	0.189141	0.195499	-1.41167	2.6056	TSHR
nervous system development (GO:0007399)	1/456	0.168517	0.17273	0.201617	0.206657	-1.2111	2.15663	TSHR
cellular protein metabolic process (GO:0044267)	1/485	0.178338	0.181285	0.213138	0.216661	-1.07977	1.86161	F2
positive regulation of cellular process (GO:0048522)	1/520	0.190055	0.191613	0.226853	0.228712	-1.23858	2.05659	TSHR
regulation of cell proliferation (GO:0042127)	1/741	0.260724	0.260724	0.308813	0.308813	-1.03303	1.3887	TSHR
